# Supplementary material for: The Targeted Regulation of BDUbc and BDSKL1 Enhances Resistance to Blight in Bambusa pervariabilis × Dendrocalamopsis grandis
Source: MDPI journal article supplement (doi:10.3390/ijms25010569), 2024-01-01
Supplement: s1 [file s1]

**Table S1.** Primers Used in This Study

| Primer name                        | Primer sequence (5'-3')                                                | Reference source |
|------------------------------------|------------------------------------------------------------------------|------------------|
| <i>BDUbc</i> -F                    | ATGGTGGACGTGTCGCGCGTGCAG                                               | AGY80454.1       |
| <i>BDUbc</i> -R                    | TCAGCCGGAGCAGAGCTTTTCAAG                                               | AGY80454.1       |
| <i>BDSKL1</i> -F                   | ACGGACTGCACTGCCAAGCGCAACAT                                             | AIA26165.1       |
| <i>BDSKL1</i> -R                   | CTAGAAGGGCCTTCCAGCAGCTTCCATC                                           | AIA26165.1       |
| q <i>BDUbc</i> -F                  | CTTGAAGACGGCGCTGCTAT                                                   | AGY80454.1       |
| q <i>BDUbc</i> -R                  | GCACCTTTTCTTCCATGCCA                                                   | AGY80454.1       |
| q <i>BDSKL1</i> -F                 | ATGTTCTTGAGGCAAGGGT                                                    | AIA26165.1       |
| q <i>BDSKL1</i> -R                 | TGAGTTCATGACGGCACCAT                                                   | AIA26165.1       |
| <i>GAPDH</i> -F                    | GATTTTGTCGGTGATTCAAGGTC                                                | Li et al., 2021  |
| <i>GAPDH</i> -R                    | ATGTGAGCGATCAGATCCAGAA                                                 | Li et al., 2021  |
| <i>Actin</i> -F                    | TGACAATGGCACTGGAATGG                                                   | Li et al., 2021  |
| <i>Actin</i> -R                    | CCCATCCCTACCATGACACC                                                   | Li et al., 2021  |
| hyg501-F                           | GAGCATATACGCCCCGGAGTC                                                  | Luo et al., 2022 |
| hyg501-R                           | CAAGACCTGCCTGAAACCGA                                                   | Luo et al., 2022 |
| pCAMBIA1301-35SN- <i>BDUbc</i> -F  | <b>ACCGCGGTGGAGCTC</b> <u>GGTACC</u><br>ATGGTGGACGTGTCGCGCGTGCAG       | AGY80454.1       |
| pCAMBIA1301-35SN- <i>BDUbc</i> -R  | <b>CTCGAGGGGGGGCCC</b> <u>GGTACC</u><br>TCAGCCGGAGCAGAGCTTTTCAAG       | AGY80454.1       |
| pCAMBIA1301-35SN- <i>BDSKL1</i> -F | <b>ACCGCGGTGGAGCTC</b> <u>GGTACC</u><br>ACGGACTGCACTGCCAAGCGCAACAT     | AIA26165.1       |
| pCAMBIA1301-35SN- <i>BDSKL1</i> -R | <b>CTCGAGGGGGGGCCC</b> <u>GGTACC</u> CTAGAAGGGCC<br>TTCCAGCAGCTTCCATC  | AIA26165.1       |
| pSuper1300-GFP- <i>BDUbc</i> -F    | <b>TTAAATACTAGTGGATCC</b> <u>GGTACC</u> ATGGACTGC<br>ACTGCCAAGCGCAACAT | AGY80454.1       |
| pSuper1300-GFP- <i>BDUbc</i> -R    | <b>CTCGCCCTTGCTCACCAT</b> <u>GGTACC</u> GAAGGGCCT<br>TCCAGCAGCTTCCATC  | AGY80454.1       |
| pSuper1300-GFP- <i>BDSKL1</i> -F   | <b>TTAAATACTAGTGGATCC</b> <u>GGTACC</u> ACGTGTCGC<br>GCGTGCAG          | AGY80454.1       |
| pSuper1300-GFP-                    | <b>CTCGCCCTTGCTCACCAT</b> <u>GGTACC</u> GAAGGGCCTT                     | AGY80454.1       |

Note: The red part of the primers can be complementarily paired with sequences on the enzyme cleavage sites of the corresponding vectors, and the underline indicates the enzyme cleavage site. All primers were designed by PRIMER PREMIER 5.0 software. All sequences were obtained from whole genome and transcriptome databases. All accession numbers were obtained from GeneBank.

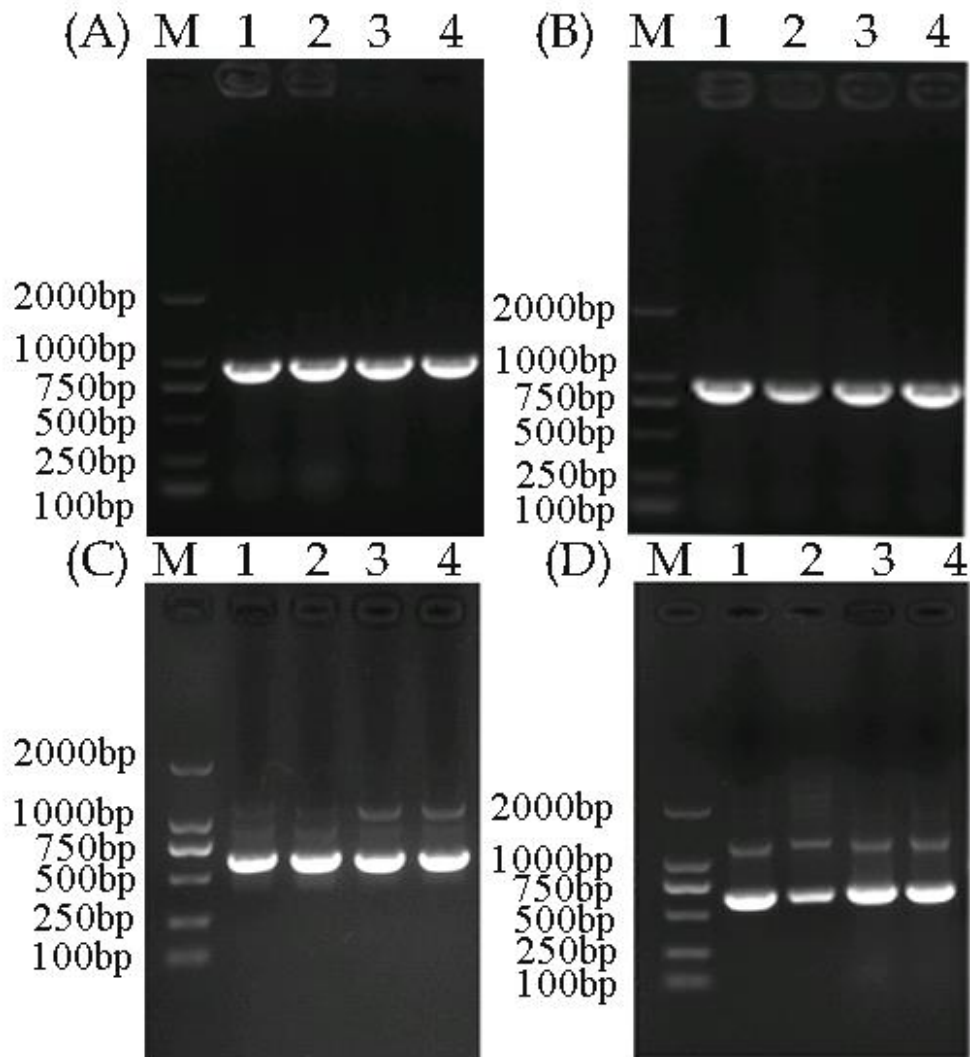

**Figure S1.** Colony PCR assay of vectors. (A) PCR assay of *E. coli* colonies with overexpression vector; (B) PCR assay of *A.tumefaciens* colonies with overexpression vector;(C) PCR assay of *E. coli* colonies with subcellularly localised vectors;(D) PCR assay of *A.tumefaciens* colonies with subcellularly localised vectors; 1, 2: *BDUbc*; 3, 4: *BDSKL1*.
